## Articles of interest in other COB journals

From *Journal of Cell Science*

### **Laminin is required for Schwann cell morphogenesis**

Wei-Ming Yu, Zu-Lin Chen, Alison J. North and Sidney Strickland

Yu, W.-M. et al. 2009. *J. Cell Sci.* doi:10.1242/jcs.033928

### **Reprogramming to a muscle fate by fusion recapitulates differentiation**

Jason H. Pomerantz, Semanti Mukherjee, Adam T. Palermo and Helen M. Blau

Pomerantz, J. H. et al. 2009. *J. Cell Sci.* doi:10.1242/jcs.041376
